# Supplementary material for: Evaluation of Arts based Courses within a UK Recovery College for People with Mental Health Challenges
Source: MDPI journal article supplement (doi:10.3390/ijerph15061170), 2018-06-04
Supplement: s1 [file s1]

## *This is to certify that*

*An evaluation of participant experiences during and after attendance on Arts based Recovery College courses investigating participants self-report about any changes in arts participation and mental health service use.*

*Has gained governance approval from the*

## *Clinical Audit Team*

*On 28 April 2016*



**Wendy Harlow,**  
*Head of Clinical Audit*
