# Supplementary material for: Evaluation of Arts based Courses within a UK Recovery College for People with Mental Health Challenges
Source: Int J Environ Res Public Health. 2018 Jun 4;15(6):1170. doi: 10.3390/ijerph15061170 (PMC6025642; doi:10.3390/ijerph15061170)
Supplement: Supplementary file 1 [file ijerph-15-01170-s001.zip]

Archive with 5 entries (5 files):
- Zip file/Figure S1_Clinical_Governance Certificate.pdf
- Zip file/Table S1.docx
- Zip file/Table S2.docx
- Zip file/Table S3.docx
- Zip file/Table S4.docx
